# Supplementary material
Source: ML conference proceedings conference paper supplement (https://openreview.net/forum?id=cM2gU9XGti)
Supplement: supplementary_material [file attachment]

## A Technical proofs

Findings presented in the body of this paper rely upon a number of supporting results, some of which borrow heavily from earlier works. The main results of this section are as follows. Lemma 4 shows that the posterior variance becomes arbitrarily small as  $\mathbf{X}_t$  becomes increasingly dense in  $\mathcal{X}$ . Lemma 6 upper bounds the expected supremum of  $f \sim \mathcal{GP}(0, k)$  based on its maximum variance. Proposition 1 and Corollary 7 prove that the PRB stopping criterion (??) almost surely converges. Finally, Proposition 2 shows that Bayesian optimization using PRB terminates and returns an  $(\epsilon, \delta)$ -optimal solution.

Where relevant, we will attribute credit at the beginning of the corresponding proof.

**Proposition 3.** *Let  $\mathcal{X} \subseteq \mathbb{R}^D$  be convex and suppose that  $\mathbf{X} \subseteq \mathcal{X}$  generates an  $\epsilon$ -cover of  $\mathcal{X}$ . For every  $\mathbf{x} \in \mathcal{X}$  and  $\rho \geq \epsilon$ , the intersection of the set  $\mathbf{X}$  and the ball  $B(\mathbf{x}, \rho) = \{\mathbf{x}' \in \mathcal{X} : \|\mathbf{x} - \mathbf{x}'\|_\infty \leq \rho\}$  generates a  $2\epsilon$ -cover of  $B(\mathbf{x}, \rho)$ .*

*Proof.* Consider the ball  $B(\mathbf{x}, r)$  with radius  $r = \rho - \epsilon$ . Since  $\mathcal{X}$  is convex, for every point  $\mathbf{a} \in B(\mathbf{x}, \rho)$  there exists a  $\mathbf{b} \in B(\mathbf{x}, r)$  such that  $\|\mathbf{a} - \mathbf{b}\|_\infty \leq \epsilon$ . Moreover, because  $\mathbf{X}$  generates an  $\epsilon$ -cover of  $\mathcal{X}$ , for every point  $\mathbf{b} \in B(\mathbf{x}, r)$  there exists a  $\mathbf{c} \in \mathbf{X}$  so that  $\|\mathbf{b} - \mathbf{c}\|_\infty \leq \epsilon$ , which implies that  $\mathbf{c} \in B(\mathbf{x}, \rho)$ . It follows by the triangle inequality that for every point  $\mathbf{a} \in B(\mathbf{x}, \rho)$  there exists a pair of points  $\mathbf{b}, \mathbf{c} \in B(\mathbf{x}, r) \times [B(\mathbf{x}, \rho) \cap \mathbf{X}]$  such that

$$\|\mathbf{a} - \mathbf{c}\|_\infty \leq \|\mathbf{a} - \mathbf{b}\|_\infty + \|\mathbf{b} - \mathbf{c}\|_\infty \leq \epsilon + \epsilon = 2\epsilon, \quad (12)$$

which completes the proof.  $\square$

**Lemma 4.** *Under assumptions A1 and A2, if  $y(\cdot) \sim \mathcal{N}(f(\cdot), \gamma^2)$  is observed on a set of points  $\mathbf{X} \subseteq \mathcal{X}$  that generates an  $\epsilon$ -cover of  $\mathcal{X}$ ,  $0 \leq \epsilon \leq \min\{1, k(\mathbf{x}, \mathbf{x})/L_k\}$ , then*

$$\text{Var}[f(\mathbf{x}) \mid y(\mathbf{X})] \leq \kappa_\epsilon(\mathbf{x}), \quad (13)$$

where

$$\kappa_\epsilon(\mathbf{x}) = \frac{[4L_k\rho(\epsilon)k(\mathbf{x}, \mathbf{x}) - L_k^2\rho(\epsilon)^2]\eta(\epsilon) + \gamma^2k(\mathbf{x}, \mathbf{x})}{[k(\mathbf{x}, \mathbf{x}) + 2L_k\rho(\epsilon)]\eta(\epsilon) + \gamma^2}$$

is given in terms of  $\eta(\epsilon) = \max\{1, \rho(\epsilon)/4\epsilon\}^D$  and  $\rho(\epsilon) = \epsilon^\epsilon$  for any  $0 < \epsilon < 1$ .

*Proof.* This result extends Lederer et al. [21, Theorem 3.1], who showed that, for all  $0 \leq \rho \leq k(\mathbf{x}, \mathbf{x})/L_k$ ,

$$\text{Var}[f(\mathbf{x}) \mid y(\mathbf{B}_\rho(\mathbf{x}))] \leq \frac{(4L_k\rho k(\mathbf{x}, \mathbf{x}) - L_k^2\rho^2)|\mathbf{B}_\rho(\mathbf{x})| + \gamma^2k(\mathbf{x}, \mathbf{x})}{(k(\mathbf{x}, \mathbf{x}) + 2L_k\rho)|\mathbf{B}_\rho(\mathbf{x})| + \gamma^2}, \quad (14)$$

where  $|\mathbf{B}_\rho(\mathbf{x})|$  is the cardinality of the set  $\mathbf{B}_\rho(\mathbf{x}) = B(\mathbf{x}, \rho) \cap \mathbf{X}$ . We would like to convert this upper bound into a function of  $0 \leq \epsilon \leq 1$ . To this end, begin by noticing that the bound (14) increases monotonically on  $0 \leq \rho \leq k(\mathbf{x}, \mathbf{x})/L_k$  and decreases monotonically on  $n = |\mathbf{B}_\rho(\mathbf{x})| \in \mathbb{N}_0$ . Substituting  $\rho(\epsilon)$  for  $\rho$  and  $\eta(\epsilon)$  for  $n$  therefore yields a valid bound so long as  $\rho \leq \rho(\epsilon) \leq k(\mathbf{x}, \mathbf{x})/L_k$  and  $0 \leq \eta(\epsilon) \leq n$ . For clarity, note that  $\rho(\epsilon)$  defines the radius of a ball around  $\mathbf{x}$  and  $\eta(\epsilon)$  denotes the minimum possible number of elements from  $\mathbf{X}$  that lie within this ball.

Starting with the latter, lower bounds on the cardinality of  $\mathbf{B}_\rho(\mathbf{x})$  may be obtained from the fact that  $\mathbf{X}$  is assumed to generate an  $\epsilon$ -cover of  $\mathcal{X}$ . By Proposition 3, it follows that  $\mathbf{B}_\rho(\mathbf{x})$  generates a  $2\epsilon$ -cover of  $B(\mathbf{x}, \rho)$ . Accordingly,  $|\mathbf{B}_\rho(\mathbf{x})|$  must be greater-equal to the minimum number of points required to construct such a cover. Under the  $\|\cdot\|_\infty$  norm, the  $\epsilon$ -covering number of a ball

$$B(\mathbf{x}, \rho) = \prod_{d=1}^D [\max(x_d - \rho, 0), \min(x_d + \rho, 1)] \quad (15)$$

is given by

$$M(B(\mathbf{x}, \rho), \|\cdot\|_\infty, \epsilon) = \prod_{d=1}^D \left\lceil \frac{\min(x_d + \rho, 1) - \max(0, x_d - \rho)}{2\epsilon} \right\rceil. \quad (16)$$

474 This number is minimized when  $B(\cdot, \rho)$  is placed in a corner, such as  $B(\mathbf{0}, \rho) = [0, \rho]^D$ . Choosing

$$\eta(\varepsilon) = \max \left\{ 1, \left( \frac{\rho(\varepsilon)}{4\varepsilon} \right)^D \right\} \leq \left\lceil \frac{\rho(\varepsilon)}{4\varepsilon} \right\rceil^D \quad (17)$$

475 therefore ensures that  $\eta(\varepsilon)$  lower bounds the cardinality of every  $\mathbf{B}_\rho(\cdot)$ . Note that there are two  
 476 factors of two at play here: one accounts for the fact that  $\mathbf{B}_\rho(\cdot)$  is only guaranteed to provide a  
 477  $2\varepsilon$ -cover of  $B(\cdot, \rho)$ , and the other accounts for the fact that the corner balls are up to  $2^D$  times smaller  
 478 than other balls with the same radius.

479 Turning our attention to the choice of function  $\rho(\varepsilon)$ , some desiderata come into focus. First, we  
 480 require  $\rho(\varepsilon) \geq \varepsilon$  so that every  $\mathbf{B}_\rho(\cdot)$  is nonempty. Second, we desire  $\lim_{\varepsilon \rightarrow 0^+} \rho(\varepsilon) = 0$  because the  
 481 resulting posterior variance bound will increase monotonically in  $\rho(\varepsilon)$ . Lastly, we want the ratio of  
 482  $\rho(\varepsilon)$  to  $\varepsilon$  to diverge to infinity as  $\varepsilon$  approaches zero from above so that  $\lim_{\varepsilon \rightarrow 0^+} \eta(\varepsilon) = \infty$ . Based  
 483 on these criteria, a convenient choice when  $\mathcal{X} = [0, 1]^D$  is

$$\rho(\varepsilon) = \varepsilon^\alpha \quad 0 < \alpha < 1. \quad (18)$$

484 In summary, the claim follows by expressing  $\rho$  as a function of  $\varepsilon$  and using it to lower bound  $|\mathbf{B}_\rho(\cdot)|$   
 485 with  $\eta(\varepsilon)$ :

$$\text{Var}[f(\mathbf{x}) \mid y(\mathbf{X})] \leq \frac{(4L_k \rho(\varepsilon) k(\mathbf{x}, \mathbf{x}) - L_k^2 \rho(\varepsilon)^2) \eta(\varepsilon) + \gamma^2 k(\mathbf{x}, \mathbf{x})}{(k(\mathbf{x}, \mathbf{x}) + 2L_k \rho(\varepsilon)) \eta(\varepsilon) + \gamma^2}. \quad (19)$$

486

□

487 **Proposition 5.** For any choice of constants  $a > 0$ ,  $b \geq 0$ ,  $c \geq 0$ ,

$$\int_0^c \sqrt{\log(1 + b\varepsilon^{-1/a})} d\varepsilon \leq c \sqrt{a^{-1} + \log(1 + bc^{-1/a})}. \quad (20)$$

488 *Proof.* This proof ammends Grünewälder et al. [15, Appendix A]. Let  $\xi = (1 + \sqrt[a]{cb}^{-1})^a$  so that

$$\int_0^c \sqrt{\log(1 + b\varepsilon^{-1/a})} d\varepsilon \leq \int_0^c \sqrt{\log(\xi^{1/a} b \varepsilon^{-1/a})} d\varepsilon. \quad (21)$$

489 Next, define auxiliary functions

$$f(u) = \sqrt{\log(u^{-1/a})} \quad g(\varepsilon) = \frac{\varepsilon}{\xi b^a} \quad (22)$$

490 such that  $f(g(\varepsilon)) = \sqrt{\log(\xi^{1/a} b \varepsilon^{-1/a})}$ , and use them to integrate by substitution as

$$\int_0^c \sqrt{\log(\xi^{1/a} b \varepsilon^{-1/a})} d\varepsilon = \xi b^a \int_0^{g(c)} \sqrt{\log(u^{-1/a})} du = \frac{\xi b^a}{\sqrt{a}} \int_0^{g(c)} \sqrt{-\log(u)} du. \quad (23)$$

491 The Cauchy-Schwarz inequality now gives

$$\int_0^{g(c)} \sqrt{-\log(u)} du \leq \left( \int_0^{g(c)} du \right)^{1/2} \left( - \int_0^{g(c)} \log(u) du \right)^{1/2} = \frac{c}{\xi b^a} \sqrt{1 - \log\left(\frac{c}{\xi b^a}\right)}. \quad (24)$$

492 Hence, the claim follows

$$\int_0^c \sqrt{\log(1 + b\varepsilon^{-1/a})} d\varepsilon \leq c \sqrt{\frac{1 + \log(\xi b^a c^{-1})}{a}} = c \sqrt{a^{-1} + \log(1 + bc^{-1/a})}. \quad (25)$$

493 For comparison with Grünewälder et al. [15], when  $b^a = 2c$  it follows that

$$\xi = \left(1 + 2^{-1/a}\right)^a \leq 2^a \implies c \sqrt{\frac{1 + \log(\xi b^a c^{-1})}{a}} = c \sqrt{\frac{1 + \log(2\xi)}{a}} \leq c \sqrt{\frac{\log(e 2^{a+1})}{a}}. \quad (26)$$

494

□

495 **Lemma 6.** Let  $f \sim \mathcal{GP}(0, k)$  be a Gaussian process with an  $L_k$ -Lipschitz continuous covariance  
 496 function  $k : \mathcal{X}^2 \rightarrow \mathbb{R}$  on  $\mathcal{X} = [0, r]^D$  having maximum variance  $\sigma^2 = \max_{\mathbf{x} \in \mathcal{X}} k(\mathbf{x}, \mathbf{x})$ . Then,

$$\mathbb{E} \left[ \sup_{\mathbf{x} \in \mathcal{X}} f(\mathbf{x}) \right] \leq 12\sigma \sqrt{2D + D \log(1 + 4L_k r \sigma^{-2})}. \quad (27)$$

497 *Proof.* This proof paraphrases parts of Grünewälder et al. [15, Section 4.3].

498 Massart [24, Theorem 3.18] proved that the expected supremum of  $f$  is upper bounded by

$$\mathbb{E} \left[ \sup_{\mathbf{x} \in \mathcal{X}} f(\mathbf{x}) \right] \leq 12 \int_0^\sigma \sqrt{\log N(\mathcal{X}, d_k, \varepsilon)} d\varepsilon, \quad (28)$$

499 where  $N(\mathcal{X}, d_k, \varepsilon)$  is defined as the  $\varepsilon$ -packing number—i.e. the largest number of points that can  
 500 be “packed” inside of  $\mathcal{X}$  without any two points being within  $\varepsilon$  of one another—under the canonical  
 501 pseudo-metric<sup>3</sup>

$$d_k(\mathbf{x}, \mathbf{x}') = \mathbb{E}[(f(\mathbf{x}) - f(\mathbf{x}'))^2]^{1/2} = \sqrt{k(\mathbf{x}, \mathbf{x}) - 2k(\mathbf{x}, \mathbf{x}') + k(\mathbf{x}', \mathbf{x}')}. \quad (29)$$

502 We may use (28) by upper bounding the right-hand side with a known quantity. We will bound the  
 503  $\varepsilon$ -packing number  $N(\mathcal{X}, d_k, \varepsilon)$ , translate this bound from the  $d_k$  pseudo-metric to the infinity norm,  
 504 and then integrate the result.

505 The first step follows immediately from the fact that the  $\varepsilon$ -packing number is smaller than the  $\frac{\varepsilon}{2}$ -  
 506 covering number—defined as the minimum number of balls  $B(\cdot, \frac{\varepsilon}{2})$  required to cover  $\mathcal{X}$ . The second  
 507 is accomplished by using Lipschitz continuity of  $k$  to show that the squared pseudo-metric  $d_k(\cdot, \cdot)^2$   
 508 is  $2L_k$ -Lipschitz: for all  $\mathbf{x}, \mathbf{x}' \in \mathcal{X}$ ,

$$d_k(\mathbf{x}, \mathbf{x}')^2 = [k(\mathbf{x}, \mathbf{x}) - k(\mathbf{x}, \mathbf{x}')] + [k(\mathbf{x}', \mathbf{x}') - k(\mathbf{x}', \mathbf{x})] \leq 2L_k \|\mathbf{x} - \mathbf{x}'\|_\infty. \quad (30)$$

509 It follows that, for any set  $\mathbf{X} \subseteq \mathcal{X}$ ,

$$\max_{\mathbf{x} \in \mathcal{X}} \min_{\mathbf{x}' \in \mathbf{X}} \|\mathbf{x} - \mathbf{x}'\|_\infty \leq C \implies \max_{\mathbf{x} \in \mathcal{X}} \min_{\mathbf{x}' \in \mathbf{X}} d_k(\mathbf{x}, \mathbf{x}') \leq \sqrt{2L_k C}. \quad (31)$$

510 An  $\varepsilon^2/8L_k$ -cover under the infinity norm therefore guarantees an  $\varepsilon/2$ -cover under  $d_k$ . The former may  
 511 be constructed from a grid of uniformly spaced points with elements at intervals of  $\varepsilon^2/4L_k$ . This grid  
 512 will consist of  $\lceil 4L_k r \varepsilon^{-2} \rceil^D$  points assuming  $\mathcal{X} = [0, r]^D$ , meaning that

$$N(\mathcal{X}, d_k, \varepsilon) < (1 + 4L_k r \varepsilon^{-2})^D. \quad (32)$$

513 To complete the proof, use Proposition 5 with  $a = \frac{1}{2}$ ,  $b = 4L_k r$ , and  $c = \sigma$  to show that

$$\mathbb{E} \left[ \sup_{\mathbf{x} \in \mathcal{X}} f(\mathbf{x}) \right] \leq 12\sqrt{D} \int_0^\sigma \sqrt{\log(1 + 4L_k r \varepsilon^{-2})} d\varepsilon \leq 12\sigma \sqrt{2D + D \log(1 + 4L_k r \sigma^{-2})}. \quad (33)$$

514 □

515 **Proposition 1.** Under assumptions A1–A3 and for all regret bounds  $\epsilon > 0$  and risk tolerances  $\delta > 0$ ,  
 516 there almost surely exists  $T \in \mathbb{N}_0$  so that, at each time  $t \geq T$ , every  $\mathbf{s}_t \in \arg \max_{\mathbf{x} \in \mathcal{X}} \mu_t(\mathbf{x})$  satisfies

$$\Psi_t(\mathbf{x}; \epsilon) = \mathbb{P}(r_t(\mathbf{s}_t) \leq \epsilon) \geq 1 - \delta. \quad (9)$$

517 *Proof.* Consider the centered process

$$g_t(\cdot) = [f_t(\cdot) - \mu_t(\cdot)] - [f_t(\mathbf{s}_t) - \mu_t(\mathbf{s}_t)], \quad (34)$$

518 with covariance

$$c_t(\mathbf{x}, \mathbf{x}') = k_t(\mathbf{x}, \mathbf{x}') - k_t(\mathbf{x}, \mathbf{s}_t) - k_t(\mathbf{s}_t, \mathbf{x}') + k_t(\mathbf{s}_t, \mathbf{s}_t). \quad (35)$$

519 The term  $\mu_t(\mathbf{s}_t) - \mu_t(\cdot)$  is nonnegative by construction such that

$$g_t^* = \sup_{\mathbf{x} \in \mathcal{X}} g_t(\mathbf{x}) \geq f_t^* - f_t(\mathbf{s}_t) \quad f_t^* = \sup_{\mathbf{x} \in \mathcal{X}} f_t(\mathbf{x}) \quad (36)$$

---

<sup>3</sup>While  $d_k$  has most of the properties of a proper metric,  $d_k(\mathbf{x}, \mathbf{x}') = 0$  does not always imply that  $\mathbf{x} = \mathbf{x}'$  [2].

520 and, therefore,

$$\mathbb{P}(g_t^* \geq \epsilon) \geq \mathbb{P}(f_t^* - f_t(\mathbf{s}_t) \geq \epsilon). \quad (37)$$

521 We would now like to use the Borell-TIS inequality [8, 38] to show that: if  $\epsilon > \mathbb{E}(g_t^*)$ , then

$$\mathbb{P}(g_t^* \geq \epsilon) \leq \exp\left(-\frac{1}{2} \left[ \frac{\epsilon - \mathbb{E}(g_t^*)}{2\sigma_t} \right]^2\right), \quad (38)$$

522 where  $\sigma_t = \max_{\mathbf{x} \in \mathcal{X}} \sqrt{k_t(\mathbf{x}, \mathbf{x})}$  and  $2\sigma_t$  appears in the denominator (rather than  $\sigma_t$ ) because  
 523  $\max_{\mathbf{x} \in \mathcal{X}} c_t(\mathbf{x}, \mathbf{x}) \leq 4\sigma_t^2$ . Since (38) is an increasing, continuous function of both  $\sigma_t \geq 0$  and  
 524  $0 \leq \mathbb{E}(g_t^*) < \epsilon$ , the claim will hold if these quantities vanish as the (global) fill distance  $h_t =$   
 525  $\max_{\mathbf{x} \in \mathcal{X}} \min_{1 \leq i \leq t} \|\mathbf{x} - \mathbf{x}_i\|_\infty$  goes to zero.

526 The former result is an immediate consequence of Lemma 4. Regarding the latter,  $f_t(\mathbf{s}_t) - \mu_t(\mathbf{s}_t)$  is  
 527 a centered random variable. It follows by linearity of expectation that

$$\mathbb{E}(g_t^*) = \mathbb{E}\left[\sup_{\mathbf{x} \in \mathcal{X}} f_t(\mathbf{x}) - \mu_t(\mathbf{x})\right]. \quad (39)$$

528 Next, denote the canonical pseudo-metric at time  $t$  by

$$d_{k_t}(\mathbf{x}, \mathbf{x}') = \mathbb{E}[(f_t(\mathbf{x}) - f_t(\mathbf{x}'))^2]^{1/2} = \sqrt{k_t(\mathbf{x}, \mathbf{x}) - 2k_t(\mathbf{x}, \mathbf{x}') + k_t(\mathbf{x}', \mathbf{x}')}. \quad (40)$$

529 This pseudo-metric is non-increasing in  $t$ . To see this, let  $\beta = k(\mathbf{x}_{t+1}, \mathbf{x}) - k(\mathbf{x}_{t+1}, \mathbf{x}')$  and write

$$\begin{aligned} d_{k_{t+1}}(\mathbf{x}, \mathbf{x}')^2 &= k_{t+1}(\mathbf{x}, \mathbf{x}) - 2k_{t+1}(\mathbf{x}, \mathbf{x}') + k_{t+1}(\mathbf{x}', \mathbf{x}') \\ &= \underbrace{k_t(\mathbf{x}, \mathbf{x}) - 2k_t(\mathbf{x}, \mathbf{x}') + k_t(\mathbf{x}', \mathbf{x}')}_{d_{k_t}(\mathbf{x}, \mathbf{x}')^2} - \underbrace{\beta^2 [k_t(\mathbf{x}_{t+1}, \mathbf{x}_{t+1}) + \gamma^2]}_{\geq 0}^{-1}. \end{aligned} \quad (41)$$

530 As  $t$  increases, points therefore become closer together under the  $d_{k_t}$  pseudo-metric. For this reason,  
 531 the posterior  $\varepsilon$ -packing number  $N(\mathcal{X}, d_{k_t}, \varepsilon)$  is less-equal to the prior  $\varepsilon$ -packing number  $N(\mathcal{X}, d_k, \varepsilon)$ .  
 532 By Lemma 6, we now have

$$\begin{aligned} \mathbb{E}(g_t^*) &\leq \int_0^{\sigma_t} \sqrt{\log N(\mathcal{X}, d_{k_t}, \varepsilon)} d\varepsilon \\ &\leq \int_0^{\sigma_t} \sqrt{\log N(\mathcal{X}, d_k, \varepsilon)} d\varepsilon \\ &\leq 12\sigma_t \sqrt{2D + D \log(1 + 4L_k \sigma_t^{-2})}. \end{aligned} \quad (42)$$

533 From here, note that (42) is an increasing, continuous function of  $\sigma_t$  that vanishes as  $\sigma_t \rightarrow \infty$ . By  
 534 Lemma 4, the same is true of  $\sigma_t$  as a function of  $h_t$ . As a result, (38) becomes arbitrarily small as  
 535  $h_t \rightarrow 0$  and there exists a constant  $h_* > 0$  such that this upper bound is less-equal to  $\delta$  whenever  
 536  $h_t \leq h_*$ . Finally, since  $(\mathbf{x}_t)$  is almost surely dense in  $\mathcal{X}$ , there almost surely exists a time  $T \in \mathbb{N}_0$   
 537 such that

$$t \geq T \implies h_t \leq h_* \implies \mathbb{P}(g_t^* > \epsilon) \leq \delta \implies \mathbb{P}(f_t^* - f_t(\mathbf{s}_t) > \epsilon) \leq \delta. \quad (43)$$

538 □

539 **Corollary 7.** Suppose assumptions A1–A3 hold and that there exists a constant  $\epsilon' > 0$  so that

$$\lim_{t \rightarrow \infty} \left[ \max_{\mathbf{x} \in \mathcal{X}} \mu_t(\mathbf{x}) - \mu_t(\mathbf{s}_t) \right] \leq \epsilon' \quad (44)$$

540 with probability one, where  $\mathbf{s}_t \in \arg \max_{\mathbf{x} \in \mathbf{X}_t} \mu_t(\mathbf{x})$ . Then, for every  $\epsilon > \epsilon'$  and  $\delta \in (0, 1]$ , there  
 541 almost surely exists a time  $T \in \mathbb{N}$  such that, for all  $t \geq T$ ,

$$\mathbb{P}\left[\sup_{\mathbf{x} \in \mathcal{X}} f_t(\mathbf{x}) - f_t(\mathbf{s}_t) \leq \epsilon\right] \geq 1 - \delta. \quad (45)$$

542 *Proof.* Per (44), there almost surely exists an  $S \in \mathbb{N}$  such that  $t \geq S \implies \max_{\mathbf{x} \in \mathcal{X}} \mu_t(\mathbf{x}) -$   
 543  $\mu_t(\mathbf{s}_t) \leq \epsilon'$ . Proposition 1 therefore implies there almost surely exists a  $T \geq S$  so that

$$t \geq T \implies \mathbb{P}[f_t^* - f_t(\mathbf{s}_t) \geq \epsilon - \epsilon'] \leq \delta, \quad (46)$$

544 which completes the proof.  $\square$

545 The assumption that the posterior mean approaches its maximum on  $(\mathbf{x}_t)$  protects against adversarial  
 546 cases where—no matter how densely we observe  $f$ —there is always an  $\mathbf{x} \in \mathcal{X} \setminus \mathbf{X}_t$  whose expected  
 547 value  $\mu_t(\mathbf{x})$  exceeds  $\mu_t(\mathbf{s}_t)$  by at least  $\epsilon$ . Note that (44) becomes a necessary condition when  $\delta < \frac{1}{2}$ .  
 548 Nevertheless, it is unclear how to ensure this condition without making stronger assumptions for  $f$   
 549 and  $(\mathbf{x}_t)$ . One can use A2 and the Cauchy-Schwarz inequality to show that the posterior mean is  
 550 Lipschitz continuous [22]; but, its Lipschitz constant may continue to grow as  $t \rightarrow \infty$ , so (44) may  
 551 not hold.

## 552 B Practical recommendations

### 553 B.1 Parameter schedules for Algorithm 1

554 We follow Mnih et al. [26] by setting  $d_j = j^{-\alpha} \frac{(\alpha-1)}{\alpha} \delta_{\text{est}}$ , where  $\alpha = 1.1$ . Given an initial sample  
 555 size  $N \in \mathbb{N}$ , we similarly define  $n_j = \lceil \beta^{j-1} N \rceil$  where  $\beta = 1.5$ . In our experiments, we set  $N = 64$ .  
 556 Using a geometric schedule for  $(n_j)$  helps to avoid cases where performing many tests with very few  
 557 samples causes  $d_j$  to become very small. In exchange, this schedule can result in nearly  $\beta$  times too  
 558 many samples being requested.

### 559 B.2 Choosing where to evaluate the stopping rule

560 If solutions must belong to the set of previously evaluate points  $\mathbf{X}_t$ , then we may safely ignore any  
 561 point  $\mathbf{x} \in \mathbf{X}_t$  for which  $\mathbb{P}(f_t(\mathbf{s}_t) - f_t(\mathbf{x}) \geq \epsilon) \geq \delta_{\text{mod}}$ . Empirically, we found that this heuristic  
 562 usually eliminates all but a few points. If solutions may be chosen freely on  $\mathcal{X}$ , we instead recommend  
 563 using a fixed number of joint draws for  $f_t^*$  and  $\mathbf{x}_t^* \in \arg \max_{\mathbf{x} \in \mathcal{X}} f_t(\mathbf{x})$  to average over

$$\mathbb{P}(r_t(\mathbf{x}) \leq \epsilon \mid f_t(\mathbf{x}) \leq f_t^*, f_t(\mathbf{x}_t^*) = f_t^*) = \Phi\left(\frac{f_t^* - \mu_{t+1}(\mathbf{x})}{k_{t+1}(\mathbf{x}, \mathbf{x})^{1/2}}\right)^{-1} \Phi\left(\frac{\mu_{t+1}(\mathbf{x}) - f_t^* - \epsilon}{k_{t+1}(\mathbf{x}, \mathbf{x})^{1/2}}\right), \quad (47)$$

564 where  $\mu_{t+1}$  and  $k_{t+1}$  are the posterior mean and variance of  $f_t$  given an additional observation  
 565  $f(\mathbf{x}_t^*) = f_t^*$  and  $\Phi$  denotes the standard normal cumulative distribution function. This estimator can  
 566 be maximize using gradient information and the resulting points can then be tested with Algorithm 1.

## 567 C Experiment Details

568 Experiments were run using a combination of GPFlow [25] and Trieste [29]. Runtimes reported in  
 569 Figure 3 were measured on an Apple M1 Pro Chip using an off-the-shelf version of TensorFlow [1].

### 570 C.1 Model specification

571 We employed Gaussian process priors  $f \sim \mathcal{GP}(\mu, k)$  with constant mean functions  $\mu(\cdot) = c$  and  
 572 Matérn- $5/2$  covariance functions equipped with ARD lengthscales.

573 **Synthetic** When optimizing functions drawn from GP priors, we set the prior mean to zero and  
 574 used unit variance kernels with lengthscales  $\ell_i = \frac{1}{4}\sqrt{D}$ . Noise variances are reported alongside  
 575 results.

576 **Real** When optimizing black-box functions, we employed broad and uninformative hyperpriors.  
 577 Let  $[\mathcal{X}]_i = [a_i, b_i]$  be the range of the  $i$ -th design variable,  $q_t : [0, 1] \rightarrow \mathbb{R}$  be the empirical  
 578 quantile function of  $y$  at time  $t$ , and  $\nu_t = \overline{\text{Var}}[\mathbf{y}_{t-1}]$  be the empirical variance of observations  
 579  $\mathbf{y}_{t-1} = \{y(\mathbf{x}_1), \dots, y(\mathbf{x}_{t-1})\}$ . Our hyperpriors are then as follows:

| Name                | Distribution               | Parameters                     |                     |
|---------------------|----------------------------|--------------------------------|---------------------|
| Constant Mean       | Uniform( $a, b$ )          | $a = q_t(0.05)$                | $b = q_t(0.95)$     |
| Log Kernel Variance | Uniform( $a, b$ )          | $a = \log(10^{-1}\nu_t)$       | $b = \log(10\nu_t)$ |
| Log Noise Variance  | Uniform( $a, b$ )          | $a = \log(10^{-9}\nu_t)$       | $b = \log(10\nu_t)$ |
| $i$ -th Lengthscale | LogNormal( $\mu, \sigma$ ) | $\mu = \frac{1}{2}(b_i - a_i)$ | $\sigma = 1$        |

Note that we directly parameterize certain hyperparameters in log-space and that, e.g.,  $\log(\theta) \sim \text{Uniform}(a, b)$  is not the same as  $\theta \sim \text{LogUniform}(e^a, e^b)$ .

## C.2 Acquisition function

In our experiments, we defined the set of feasible solutions at time  $t \in \mathbb{N}$  as the set of previously evaluated points  $\mathbf{X}_t$ . Under these circumstances, one can show that the optimal one-step policy is given by an “in-sample” version of the Knowledge Gradient strategy [27, 12]. Let

$$\mu_{t+1}(\cdot; \mathbf{x}, z) = \mu_t(\cdot) + \frac{k_t(\cdot, \mathbf{x})z}{\sqrt{k_t(\mathbf{x}, \mathbf{x}) + \gamma^2}} \quad (48)$$

be the posterior mean of  $f$  at time  $t + 1$  if we observe  $y_{t+1} = \mu_t(\mathbf{x}) + \sqrt{k_t(\mathbf{x}, \mathbf{x}) + \gamma^2}z$ , where  $z \sim \mathcal{N}(0, 1)$ . Then, the aforementioned acquisition function is given by

$$\text{ISKG}_t(\mathbf{x}) = \mathbb{E}_z \left[ \max \mu_{t+1}(\mathbf{X}_t \cup \{\mathbf{x}\}; \mathbf{x}, z) \right] - \max \mu_t(\mathbf{X}_t) \quad z \sim \mathcal{N}(0, 1). \quad (49)$$

ISKG is identical to the Expected Improvement function when  $\gamma^2 = 0$  [32], but avoids pathologies (such as re-evaluated previously observed points) when  $\gamma^2 > 0$ .

In practice, we estimated (49) with Gauss-Hermite quadrature and maximized it using multi-start gradient ascent [41, 5]. Starting positions we obtained by running CMA-ES [16] several times to partial convergence. The best point from each run was then combined with a large number of random points and the top 16 points were fine-tuned using L-BFGS-B [9].

## C.3 Link function

When modeling classification rates for MNIST and Adult, we used a logit (i.e. inverse sigmoid) link function,

$$g(y) = \log\left(\frac{y}{1-y}\right) \quad g^{-1}(x) = \frac{1}{1+e^{-x}}, \quad (50)$$

in order so that  $g^{-1} \circ f : \mathcal{X} \rightarrow [0, 1]$ . When evaluating stopping rules, we handled this link functions by pulling draws of, e.g.,  $f_t(\mathbf{x})$  backward through  $g$  and using the resulting values to estimate expectations and probabilities. This approach was used for all but  $\Delta\text{CB}$  [23], where we instead computed  $g^{-1} \circ \text{UCB}_t$  and  $g^{-1} \circ \text{LCB}_t$ .

## C.4 Convolutional neural networks

When training convolutional neural networks (CNNs) on MNIST [11], we used a simple architecture consisting of two convolutional layers with  $3 \times 3$  filters and ReLU activation functions [3] followed by max pooling layers with a pool-size of 2. The output of the final pooling layer was flattened and subjected to dropout before being passed to a dense classification layer consisting of ten neurons. Each model was trained using Adam [19], with batches of size 64. The search space for this problem was four-dimensional as seen on the right. Integer valued parameters were handled by rounding to the nearest value.

| Name              | Low             | High |
|-------------------|-----------------|------|
| Number of filters | 1               | 64   |
| Number of epochs  | 1               | 25   |
| Log learning rate | $\log(10^{-5})$ | 0    |
| Dropout rate      | 0               | 1    |

## C.5 XGBoost Classifiers

614 We used an off-the-shelf implementation of XG-  
615 Boost [10] for the the adult income classifica-  
616 tion problem [7]. The search space was three-  
617 dimensional and is shown on the right. Integer  
618 valued parameters were handled by rounding to  
619 the nearest value.

| Name                     | Low             | High         |
|--------------------------|-----------------|--------------|
| Maximum tree depth       | 1               | 10           |
| Log number of estimators | 0               | $\log(10^3)$ |
| Log learning rate        | $\log(10^{-3})$ | 0            |

## 620 D Extended Results

### 621 D.1 Results without adjusted cutoff values

| Problem                         | $D$ | $T$ | Oracle <sup>†</sup> | Budget <sup>†</sup> | Acq             | $\Delta\text{CB}$ | $\Delta\text{ES}$ | PRB             |
|---------------------------------|-----|-----|---------------------|---------------------|-----------------|-------------------|-------------------|-----------------|
| <b>GP<sup>†</sup></b> $10^{-6}$ | 2   | 64  | 10 (100)            | 17 (96)             | 28 (100)        | 12 (89)           | 14 (94)           | <b>17 (97)</b>  |
| <b>GP<sup>†</sup></b> $10^{-2}$ | 2   | 128 | 11 (100)            | 22 (96)             | 78 (100)        | 82 (100)          | 18 (91)           | <b>23 (99)</b>  |
| <b>GP<sup>†</sup></b> $10^{-6}$ | 4   | 128 | 27 (100)            | 64 (95)             | 90 (100)        | 23 (66)           | 28 (74)           | <b>64 (99)</b>  |
| <b>GP<sup>†</sup></b> $10^{-2}$ | 4   | 256 | 30 (100)            | 94 (95)             | 106 (98)        | 256 (100)         | 36 (65)           | <b>86 (96)</b>  |
| <b>GP<sup>†</sup></b> $10^{-6}$ | 6   | 256 | 40 (99)             | 124 (95)            | 142 (98)        | 31 (50)           | 46 (65)           | <b>134 (98)</b> |
| <b>GP<sup>†</sup></b> $10^{-2}$ | 6   | 512 | 65 (100)            | 227 (96)            | <b>181 (96)</b> | 512 (100)         | 45 (34)           | 235 (100)       |
| <b>GP</b> $10^{-6}$             | 4   | 128 | 35 (100)            | 79 (95)             | <b>92 (100)</b> | 18 (30)           | 22 (41)           | 61 (88)         |
| <b>GP</b> $10^{-2}$             | 4   | 256 | 51 (100)            | 157 (95)            | <b>128 (97)</b> | 224 (80)          | 27 (22)           | 100 (92)        |
| <b>Branin</b>                   | 2   | 128 | 19 (100)            | 25 (95)             | 64 (100)        | <b>31 (99)</b>    | 32 (100)          | 33 (99)         |
| <b>Hartmann</b>                 | 3   | 64  | 14 (100)            | 22 (96)             | 26 (100)        | 15 (83)           | 17 (84)           | <b>19 (100)</b> |
| <b>Hartmann</b>                 | 6   | 64  | 36 (67)             | 256 (67)            | 40 (67)         | 26 (46)           | 30 (56)           | 40 (64)         |
| <b>Rosenbrock</b>               | 4   | 96  | 34 (100)            | 46 (95)             | 95 (100)        | <b>68 (99)</b>    | 71 (100)          | 84 (100)        |
| <b>CNN</b>                      | 4   | 256 | 5 (100)             | 11 (96)             | 64 (100)        | 8 (92)            | 14 (94)           | <b>17 (100)</b> |
| <b>XGBoost</b>                  | 3   | 128 | 4 (100)             | 8 (97)              | 128 (100)       | <b>16 (97)</b>    | 19 (99)           | 28 (99)         |

Table 2: Same as Table 1, but where  $\epsilon$  is used as the cutoff value for  $\Delta\text{CB}$  and  $\Delta\text{ES}$ .



## NeurIPS Paper Checklist

### 1. Claims

Question: Do the main claims made in the abstract and introduction accurately reflect the paper’s contributions and scope?

Answer: [\[Yes\]](#)

Justification: All claims are either discussed in the main or in Appendix A.

Guidelines:

- The answer NA means that the abstract and introduction do not include the claims made in the paper.
- The abstract and/or introduction should clearly state the claims made, including the contributions made in the paper and important assumptions and limitations. A No or NA answer to this question will not be perceived well by the reviewers.
- The claims made should match theoretical and experimental results, and reflect how much the results can be expected to generalize to other settings.
- It is fine to include aspirational goals as motivation as long as it is clear that these goals are not attained by the paper.

### 2. Limitations

Question: Does the paper discuss the limitations of the work performed by the authors?

Answer: [\[Yes\]](#)

Justification: The primary limitation of the proposed is that it relies on an underlying model being well-calibrated. This issue is clearly discussed at prominent locations in the text, such as the introduction and experiments section.

Guidelines:

- The answer NA means that the paper has no limitation while the answer No means that the paper has limitations, but those are not discussed in the paper.
- The authors are encouraged to create a separate “Limitations” section in their paper.
- The paper should point out any strong assumptions and how robust the results are to violations of these assumptions (e.g., independence assumptions, noiseless settings, model well-specification, asymptotic approximations only holding locally). The authors should reflect on how these assumptions might be violated in practice and what the implications would be.
- The authors should reflect on the scope of the claims made, e.g., if the approach was only tested on a few datasets or with a few runs. In general, empirical results often depend on implicit assumptions, which should be articulated.
- The authors should reflect on the factors that influence the performance of the approach. For example, a facial recognition algorithm may perform poorly when image resolution is low or images are taken in low lighting. Or a speech-to-text system might not be used reliably to provide closed captions for online lectures because it fails to handle technical jargon.
- The authors should discuss the computational efficiency of the proposed algorithms and how they scale with dataset size.
- If applicable, the authors should discuss possible limitations of their approach to address problems of privacy and fairness.
- While the authors might fear that complete honesty about limitations might be used by reviewers as grounds for rejection, a worse outcome might be that reviewers discover limitations that aren’t acknowledged in the paper. The authors should use their best judgment and recognize that individual actions in favor of transparency play an important role in developing norms that preserve the integrity of the community. Reviewers will be specifically instructed to not penalize honesty concerning limitations.

### 3. Theory Assumptions and Proofs

Question: For each theoretical result, does the paper provide the full set of assumptions and a complete (and correct) proof?



Answer: [\[Yes\]](#)

Justification: Assumptions are clearly stated throughout the paper (e.g., in Section 4) and detailed proofs are provided in Appendix A.

Guidelines:

- The answer NA means that the paper does not include theoretical results.
- All the theorems, formulas, and proofs in the paper should be numbered and cross-referenced.
- All assumptions should be clearly stated or referenced in the statement of any theorems.
- The proofs can either appear in the main paper or the supplemental material, but if they appear in the supplemental material, the authors are encouraged to provide a short proof sketch to provide intuition.
- Inversely, any informal proof provided in the core of the paper should be complemented by formal proofs provided in appendix or supplemental material.
- Theorems and Lemmas that the proof relies upon should be properly referenced.

#### 4. Experimental Result Reproducibility

Question: Does the paper fully disclose all the information needed to reproduce the main experimental results of the paper to the extent that it affects the main claims and/or conclusions of the paper (regardless of whether the code and data are provided or not)?

Answer: [\[Yes\]](#)

Justification: Details are provided in the text or in supplementary material.

Guidelines:

- The answer NA means that the paper does not include experiments.
- If the paper includes experiments, a No answer to this question will not be perceived well by the reviewers: Making the paper reproducible is important, regardless of whether the code and data are provided or not.
- If the contribution is a dataset and/or model, the authors should describe the steps taken to make their results reproducible or verifiable.
- Depending on the contribution, reproducibility can be accomplished in various ways. For example, if the contribution is a novel architecture, describing the architecture fully might suffice, or if the contribution is a specific model and empirical evaluation, it may be necessary to either make it possible for others to replicate the model with the same dataset, or provide access to the model. In general, releasing code and data is often one good way to accomplish this, but reproducibility can also be provided via detailed instructions for how to replicate the results, access to a hosted model (e.g., in the case of a large language model), releasing of a model checkpoint, or other means that are appropriate to the research performed.
- While NeurIPS does not require releasing code, the conference does require all submissions to provide some reasonable avenue for reproducibility, which may depend on the nature of the contribution. For example
  - (a) If the contribution is primarily a new algorithm, the paper should make it clear how to reproduce that algorithm.
  - (b) If the contribution is primarily a new model architecture, the paper should describe the architecture clearly and fully.
  - (c) If the contribution is a new model (e.g., a large language model), then there should either be a way to access this model for reproducing the results or a way to reproduce the model (e.g., with an open-source dataset or instructions for how to construct the dataset).
  - (d) We recognize that reproducibility may be tricky in some cases, in which case authors are welcome to describe the particular way they provide for reproducibility. In the case of closed-source models, it may be that access to the model is limited in some way (e.g., to registered users), but it should be possible for other researchers to have some path to reproducing or verifying the results.

#### 5. Open access to data and code

727 Question: Does the paper provide open access to the data and code, with sufficient instruc-  
728 tions to faithfully reproduce the main experimental results, as described in supplemental  
729 material?

730 Answer: No

731 Justification: Code will be made available as part of the final release of this work, but was  
732 not ready in time for the initial submission.

733 Guidelines:

- 734 • The answer NA means that paper does not include experiments requiring code.
- 735 • Please see the NeurIPS code and data submission guidelines ([https://nips.cc/  
736 public/guides/CodeSubmissionPolicy](https://nips.cc/public/guides/CodeSubmissionPolicy)) for more details.
- 737 • While we encourage the release of code and data, we understand that this might not be  
738 possible, so “No” is an acceptable answer. Papers cannot be rejected simply for not  
739 including code, unless this is central to the contribution (e.g., for a new open-source  
740 benchmark).
- 741 • The instructions should contain the exact command and environment needed to run to  
742 reproduce the results. See the NeurIPS code and data submission guidelines ([https:  
743 //nips.cc/public/guides/CodeSubmissionPolicy](https://nips.cc/public/guides/CodeSubmissionPolicy)) for more details.
- 744 • The authors should provide instructions on data access and preparation, including how  
745 to access the raw data, preprocessed data, intermediate data, and generated data, etc.
- 746 • The authors should provide scripts to reproduce all experimental results for the new  
747 proposed method and baselines. If only a subset of experiments are reproducible, they  
748 should state which ones are omitted from the script and why.
- 749 • At submission time, to preserve anonymity, the authors should release anonymized  
750 versions (if applicable).
- 751 • Providing as much information as possible in supplemental material (appended to the  
752 paper) is recommended, but including URLs to data and code is permitted.

## 753 6. Experimental Setting/Details

754 Question: Does the paper specify all the training and test details (e.g., data splits, hyper-  
755 parameters, how they were chosen, type of optimizer, etc.) necessary to understand the  
756 results?

757 Answer: [Yes]

758 Justification: Details are provided in the text or in supplementary material.

759 Guidelines:

- 760 • The answer NA means that the paper does not include experiments.
- 761 • The experimental setting should be presented in the core of the paper to a level of detail  
762 that is necessary to appreciate the results and make sense of them.
- 763 • The full details can be provided either with the code, in appendix, or as supplemental  
764 material.

## 765 7. Experiment Statistical Significance

766 Question: Does the paper report error bars suitably and correctly defined or other appropriate  
767 information about the statistical significance of the experiments?

768 Answer: [Yes]

769 Justification: Quantiles for key metrics are reported in Appendix D.

770 Guidelines:

- 771 • The answer NA means that the paper does not include experiments.
- 772 • The authors should answer “Yes” if the results are accompanied by error bars, confi-  
773 dence intervals, or statistical significance tests, at least for the experiments that support  
774 the main claims of the paper.
- 775 • The factors of variability that the error bars are capturing should be clearly stated (for  
776 example, train/test split, initialization, random drawing of some parameter, or overall  
777 run with given experimental conditions).

- The method for calculating the error bars should be explained (closed form formula, call to a library function, bootstrap, etc.)
- The assumptions made should be given (e.g., Normally distributed errors).
- It should be clear whether the error bar is the standard deviation or the standard error of the mean.
- It is OK to report 1-sigma error bars, but one should state it. The authors should preferably report a 2-sigma error bar than state that they have a 96% CI, if the hypothesis of Normality of errors is not verified.
- For asymmetric distributions, the authors should be careful not to show in tables or figures symmetric error bars that would yield results that are out of range (e.g. negative error rates).
- If error bars are reported in tables or plots, The authors should explain in the text how they were calculated and reference the corresponding figures or tables in the text.

## 8. Experiments Compute Resources

Question: For each experiment, does the paper provide sufficient information on the computer resources (type of compute workers, memory, time of execution) needed to reproduce the experiments?

Answer: No.

Justification: We ran thousands of experiments on heterogenous hardware at different points in time and did not keep track.

Guidelines:

- The answer NA means that the paper does not include experiments.
- The paper should indicate the type of compute workers CPU or GPU, internal cluster, or cloud provider, including relevant memory and storage.
- The paper should provide the amount of compute required for each of the individual experimental runs as well as estimate the total compute.
- The paper should disclose whether the full research project required more compute than the experiments reported in the paper (e.g., preliminary or failed experiments that didn't make it into the paper).

## 9. Code Of Ethics

Question: Does the research conducted in the paper conform, in every respect, with the NeurIPS Code of Ethics <https://neurips.cc/public/EthicsGuidelines>?

Answer: [Yes]

Justification: This question is not particular relevant to our submission, since our focus is on making existing optimization algorithms, e.g., more cost-efficient.

Guidelines:

- The answer NA means that the authors have not reviewed the NeurIPS Code of Ethics.
- If the authors answer No, they should explain the special circumstances that require a deviation from the Code of Ethics.
- The authors should make sure to preserve anonymity (e.g., if there is a special consideration due to laws or regulations in their jurisdiction).

## 10. Broader Impacts

Question: Does the paper discuss both potential positive societal impacts and negative societal impacts of the work performed?

Answer: [Yes]

Justification: This question is not particular relevant to our submission, since our focus is on making existing optimization algorithms, e.g., more cost-efficient.

Guidelines:

- The answer NA means that there is no societal impact of the work performed.
- If the authors answer NA or No, they should explain why their work has no societal impact or why the paper does not address societal impact.

- Examples of negative societal impacts include potential malicious or unintended uses (e.g., disinformation, generating fake profiles, surveillance), fairness considerations (e.g., deployment of technologies that could make decisions that unfairly impact specific groups), privacy considerations, and security considerations.
- The conference expects that many papers will be foundational research and not tied to particular applications, let alone deployments. However, if there is a direct path to any negative applications, the authors should point it out. For example, it is legitimate to point out that an improvement in the quality of generative models could be used to generate deepfakes for disinformation. On the other hand, it is not needed to point out that a generic algorithm for optimizing neural networks could enable people to train models that generate Deepfakes faster.
- The authors should consider possible harms that could arise when the technology is being used as intended and functioning correctly, harms that could arise when the technology is being used as intended but gives incorrect results, and harms following from (intentional or unintentional) misuse of the technology.
- If there are negative societal impacts, the authors could also discuss possible mitigation strategies (e.g., gated release of models, providing defenses in addition to attacks, mechanisms for monitoring misuse, mechanisms to monitor how a system learns from feedback over time, improving the efficiency and accessibility of ML).

## 11. Safeguards

Question: Does the paper describe safeguards that have been put in place for responsible release of data or models that have a high risk for misuse (e.g., pretrained language models, image generators, or scraped datasets)?

Answer: [NA]

Justification: The proposed methods do not lend themselves to the this type of misuse.

Guidelines:

- The answer NA means that the paper poses no such risks.
- Released models that have a high risk for misuse or dual-use should be released with necessary safeguards to allow for controlled use of the model, for example by requiring that users adhere to usage guidelines or restrictions to access the model or implementing safety filters.
- Datasets that have been scraped from the Internet could pose safety risks. The authors should describe how they avoided releasing unsafe images.
- We recognize that providing effective safeguards is challenging, and many papers do not require this, but we encourage authors to take this into account and make a best faith effort.

## 12. Licenses for existing assets

Question: Are the creators or original owners of assets (e.g., code, data, models), used in the paper, properly credited and are the license and terms of use explicitly mentioned and properly respected?

Answer: [Yes]

Justification: The content of this paper was either created by the authors for use herein. Borrowed material has been cited.

Guidelines:

- The answer NA means that the paper does not use existing assets.
- The authors should cite the original paper that produced the code package or dataset.
- The authors should state which version of the asset is used and, if possible, include a URL.
- The name of the license (e.g., CC-BY 4.0) should be included for each asset.
- For scraped data from a particular source (e.g., website), the copyright and terms of service of that source should be provided.

- If assets are released, the license, copyright information, and terms of use in the package should be provided. For popular datasets, [paperswithcode.com/datasets](https://paperswithcode.com/datasets) has curated licenses for some datasets. Their licensing guide can help determine the license of a dataset.
- For existing datasets that are re-packaged, both the original license and the license of the derived asset (if it has changed) should be provided.
- If this information is not available online, the authors are encouraged to reach out to the asset's creators.

### 13. New Assets

Question: Are new assets introduced in the paper well documented and is the documentation provided alongside the assets?

Answer: [NA]

Justification: Noe assets have been released at this time.

Guidelines:

- The answer NA means that the paper does not release new assets.
- Researchers should communicate the details of the dataset/code/model as part of their submissions via structured templates. This includes details about training, license, limitations, etc.
- The paper should discuss whether and how consent was obtained from people whose asset is used.
- At submission time, remember to anonymize your assets (if applicable). You can either create an anonymized URL or include an anonymized zip file.

### 14. Crowdsourcing and Research with Human Subjects

Question: For crowdsourcing experiments and research with human subjects, does the paper include the full text of instructions given to participants and screenshots, if applicable, as well as details about compensation (if any)?

Answer: [NA]

Justification: Not revelent.

Guidelines:

- The answer NA means that the paper does not involve crowdsourcing nor research with human subjects.
- Including this information in the supplemental material is fine, but if the main contribution of the paper involves human subjects, then as much detail as possible should be included in the main paper.
- According to the NeurIPS Code of Ethics, workers involved in data collection, curation, or other labor should be paid at least the minimum wage in the country of the data collector.

### 15. Institutional Review Board (IRB) Approvals or Equivalent for Research with Human Subjects

Question: Does the paper describe potential risks incurred by study participants, whether such risks were disclosed to the subjects, and whether Institutional Review Board (IRB) approvals (or an equivalent approval/review based on the requirements of your country or institution) were obtained?

Answer: [NA]

Justification: Not relevnat.

Guidelines:

- The answer NA means that the paper does not involve crowdsourcing nor research with human subjects.
- Depending on the country in which research is conducted, IRB approval (or equivalent) may be required for any human subjects research. If you obtained IRB approval, you should clearly state this in the paper.

- 931 • We recognize that the procedures for this may vary significantly between institutions  
932 and locations, and we expect authors to adhere to the NeurIPS Code of Ethics and the  
933 guidelines for their institution.
- 934 • For initial submissions, do not include any information that would break anonymity (if  
935 applicable), such as the institution conducting the review.
